# Supplementary material for: Coagulation Parameters in Human Immunodeficiency Virus Infected Patients: A Systematic Review and Meta-Analysis
Source: AIDS Res Treat. 2022 Apr 21;2022:6782595. doi: 10.1155/2022/6782595 (PMC9050251; doi:10.1155/2022/6782595)
Supplement: Supplementary Materials — Table S1: search strategy for PubMed. Table S2: Preferred Reporting Items for Systematic Reviews and Meta-Analyses (PRISMA) checklist. Table S3: quality assessment results of included studies on coagulation parameters of HIV-infected patients. [file 6782595.f1.zip]

Archive with 3 entries (3 files):
- 6782595.f1/Table S1 Search strategy on pub med HIV.docx
- 6782595.f1/Table S2 PRISMA checklist.docx
- 6782595.f1/Table S3 Quality score.docx
